# Supplementary material
Source: HighWire-hosted journal article supplement (https://ez-admanager.com/highwire/filestream/136444/field_highwire_adjunct_files/0/tsivgoulis_1103.pdf)
Supplement: tsivgoulis_1103.pdf [file tsivgoulis_1103.pdf]

# El pretratamiento con estatinas está asociado con una mejor evolución en el accidente cerebrovascular por aterosclerosis de grandes arterias

Georgios Tsivgoulis, MD  
Aristeidis H. Katsanos, MD  
Vijay K. Sharma, MD  
Christos Krogias, MD  
Robert Mikulik, MD  
Konstantinos Vadikolias, MD  
Milija Mijajlovic, MD  
Apostolos Safouris, MD  
Christina Zompola, MD  
Simon Faissner, MD  
Viktor Weiss, MD  
Sotirios Giannopoulos, MD  
Spyros Vasdekis, MD  
Efsthios Boviatsis, MD  
Anne W. Alexandrov, PhD  
Konstantinos Voumvourakis, MD  
Andrei V. Alexandrov, MD

## RESUMEN

**Objetivo:** Aunque el pretratamiento con estatinas está asociado con mejores resultados funcionales y menor riesgo de mortalidad en el accidente cerebrovascular isquémico, hay pocos datos que evalúan esta asociación en el accidente cerebrovascular isquémico agudo debido a aterosclerosis de grandes arterias (AGA), que conlleva el riesgo más alto de recurrencia temprana del infarto cerebral.

**Métodos:** Se evaluaron de forma prospectiva pacientes consecutivos con AGA aguda de 7 centros de infarto cerebral de tercer nivel durante un período de 3 años. Fueron registrados el pretratamiento con estatinas, las características demográficas, los factores de riesgo vascular y la severidad del infarto al ingreso y al alta. Los eventos de interés durante la evolución fueron la mejoría neurológica durante la hospitalización (cuantificada como la reducción relativa en el puntaje de la escala de infarto cerebral del NIH al alta en comparación con la admisión hospitalaria), el resultado funcional favorable (RFF) (definido como un puntaje en la escala de Rankin modificada de 0-1), infarto cerebral recurrente y muerte al mes. Se realizaron análisis estadísticos utilizando modelos de regresión Cox univariable y multivariable ajustando para posibles confundidores. Todos los análisis fueron repetidos siguiendo un pareamiento por puntaje de propensión.

**Resultados:** Se documentó el pretratamiento con estatinas en 192 (37,2%) de 516 pacientes consecutivos con AGA (edad media:  $65 \pm 13$  años; 60,8% hombre; mediana del puntaje en la escala de infarto del NIH: 9 puntos, rango intercuartil: 5-18). El pretratamiento con estatinas estuvo asociado con una mayor mejoría neurológica durante la hospitalización y mayores tasas de RFF a 30 días en los análisis no pareados y pareados (*odds ratio* para RFF: 2,44; intervalo de confianza [IC] 95%: 1,07-5,53). También estuvo relacionado con un menor riesgo de mortalidad al mes y de recurrencia de infarto en los análisis no pareados y pareados (*hazard ratio* para infarto recurrente: 0,11; IC 95%: 0,02-0,46; *hazard ratio* para muerte: 0,24; IC 95%: 0,08-0,75).

**Conclusión:** El pretratamiento con estatinas en pacientes con AGA aguda parece estar asociado con mejores resultados tempranos en cuanto a la mejoría neurológica, la discapacidad, la sobrevida y la recurrencia del accidente cerebrovascular. *Neurology*® 2016;86:1103-1111

## GLOSARIO

**ACVi** = accidente cerebrovascular isquémico; **AGA** = aterosclerosis de grandes arterias; **AHA** = American Heart Association; **ECA** = ensayo controlado y aleatorizado; **ERm** = escala de Rankin modificada; **HR** = *hazard ratio*; **IC** = intervalo de confianza; **NIHSS** = escala de infarto del NIH; **OR** = *odds ratio*; **RFF** = resultado funcional favorable; **TEV** = trombólisis endovenosa.

Tomar estatinas antes de un infarto cerebral puede mejorar los resultados tempranos incluyendo el deterioro neurológico temprano, la mortalidad y la discapacidad en pacientes con accidente cerebrovascular isquémico (ACVi).<sup>1,2</sup> En un meta-análisis reciente, el pretratamiento con estatinas redujo el riesgo de mortalidad, mientras aumentó el buen resultado funcional a 3 meses del inicio del infarto.<sup>3</sup> En otra revisión sistemática, el efecto beneficioso de las estatinas en el ACVi fue más profundo en pacientes con alto riesgo vascular y en pacientes con niveles ideales de lipoproteína de baja densidad.<sup>4</sup>

Correspondencia al  
Dr. Tsivgoulis:  
tsivgoulisgorg@yahoo.org

Del Department of Neurology (G.T., A.W.A., A.V.A.), University of Tennessee Health Science Center, Memphis; Second Department of Neurology (G.T., A.H.K., C.Z., K. Voumvourakis), Attikon University Hospital, School of Medicine, University of Athens, Greece; International Clinical Research Center (G.T., R.M., V.W.), St. Anne's University Hospital in Brno, Czech Republic; Department of Neurology (A.H.K., S.G.), University Hospital of Ioannina, School of Medicine, University of Ioannina, Greece; Division of Neurology (V.K.S.), Yong Loo Lin School of Medicine, National University of Singapore; Department of Neurology (C.K., S.F.), St. Josef-Hospital, Ruhr University, Bochum, Germany; Neurology Department (R.M., V.W.), St. Anne's Hospital and Masaryk University, Brno, Czech Republic; Department of Neurology (K.Vadikolias), University Hospital of Alexandroupolis, Democritus University of Thrace, Alexandroupolis, Greece; Neurology Clinic (M.M.), Clinical Center of Serbia, School of Medicine, University of Belgrade, Serbia; Stroke Unit (A.S.), Department of Neurology, Brugmann University Hospital, Brussels, Belgium; Departments of Vascular Surgery (S.V.) and Neurosurgery (E.B.), Attikon University Hospital, University of Athens, Greece; and Australian Catholic University (A.W.A.), Sydney, Australia.

Ir a [Neurology.org](http://Neurology.org) para declaraciones de intereses completas. La información sobre fondos y aquellas declaraciones relevantes para los autores, si existiesen, se encuentran al final del artículo.

A pesar del hecho de que la aterosclerosis de grandes arterias (AGA) conlleva el mayor riesgo de infarto recurrente temprano en comparación con otros subtipos de ACVi,<sup>5,6</sup> el efecto beneficioso potencial del pretratamiento con estatinas no ha sido investigado en este subgrupo específico de infartos. Debe tenerse en cuenta que un estudio multicéntrico reciente indicó que el pretratamiento con estatinas redujo el riesgo de isquemia cerebral recurrente en pacientes con AIT debido a estenosis carotídea sintomática, pero no tuvo un efecto prospectivo en pacientes con AIT sin estenosis carotídea.<sup>7</sup> En vista de las consideraciones previas, nosotros condujimos un estudio multicéntrico internacional cuyo objetivo fue evaluar la relación potencial entre el pretratamiento con estatinas y los resultados tempranos en pacientes con AGA aguda.

**MÉTODOS Población del estudio.** Evaluamos de forma prospectiva pacientes consecutivos con su primer ACVi con AGA de 7 centros terciarios de cuidado de ACV que fueron enrolados durante un período de estudio de 3 años (junio de 2011 a junio de 2014). Se puede encontrar información adicional sobre los centros participantes en los *e-Methods* en el sitio Web de *Neurology*<sup>®</sup> en *Neurology.org*. La AGA fue diagnosticada de acuerdo con los criterios TOAST (Trial of Org 10172 in Acute Stroke Treatment).<sup>8</sup> Hay información adicional referente a la definición de AGA en los *e-Methods*.

Las neuroimágenes vasculares (incluso ecografías [ecografía doppler cervical, ecografía transcraneal] y angiorrresonancia o angiografía por TC de vasos cervicales y cerebrales) fueron realizadas durante la hospitalización como parte del protocolo diagnóstico estándar en todos los casos.<sup>9-11</sup> Los pacientes con AIT, infarto cerebral recurrente, falta de información sobre el pretratamiento con estatinas y falta de información sobre el seguimiento, fueron excluidos de más evaluaciones. Hay información adicional sobre las variables registradas en los *e-Methods*.

**Manejo intrahospitalario.** Todos los pacientes fueron tratados durante la hospitalización de acuerdo con las recomendaciones más recientes (antes del inicio del estudio) de la *American Heart Association* (AHA)<sup>12</sup> para ACVi en todos los centros participantes. El pretratamiento con estatinas no fue discontinuado durante la hospitalización en todos los centros participantes. Las estatinas también fueron iniciadas al alta en los pacientes indicados sin historia de pretratamiento con estatinas de acuerdo con las recomendaciones actuales de la AHA para prevención secundaria del infarto.<sup>13</sup> La endarterectomía carotídea fue realizada en pacientes con AGA que tuvieran estenosis carotídea extracranial sintomática ( $\geq 50\%$ ) de acuerdo con las recomendaciones de la AHA<sup>14</sup> durante las primeras 2 semanas siguientes al inicio de los síntomas en pacientes sin discapacidad residual o mínima discapacidad (grado 0-2 en la escala de Rankin modificada [ERm]), como fue reportado previamente.<sup>11</sup> Todos los pacientes restantes con AGA que tuvieran enfermedad aterosclerótica extra o intracranial en todos los centros participantes fueron manejados de forma conservadora de acuerdo con las guías actuales de la AHA.<sup>12</sup>

**Seguimiento.** Seguimos de forma prospectiva a todos los pacientes en la clínica ambulatoria de infarto cerebral de los centros previamente mencionados y evaluamos el estado clínico a los 30 días del inicio de los síntomas, como se

describió previamente.<sup>9-11</sup> Capturamos prospectivamente los siguientes eventos resultantes durante los primeros 30 días del ictus: (1) mejoría neurológica durante la hospitalización, (2) muerte, (3) infarto cerebral recurrente y (4) resultado funcional favorable (RFF) durante el primer mes luego del evento índice. La mejoría neurológica fue cuantificada como un descenso relativo en el puntaje de la escala de infarto del NIH (NIHSS) al alta hospitalaria en comparación con la admisión hospitalaria ( $(\text{NIHSS}_{\text{adm}} - \text{NIHSS}_{\text{alt}}) / \text{NIHSS}_{\text{adm}} \times 100\%$ ).<sup>15,16</sup> Los infartos cerebrales recurrentes fueron diagnosticados como eventos cerebrovasculares que ocurrieron súbitamente, de duración  $> 24$  horas y que resultaron en un aumento de los déficits neurológicos previos o que causaron nuevos síntomas y signos neurológicos.<sup>10</sup> La presencia de una lesión nueva en las imágenes cerebrales de seguimiento que involucraran un sitio anatómico o territorio vascular que no estaba afectado en la TC de ingreso fue un pre-requisito, junto con los hallazgos clínicos, para el diagnóstico de infarto recurrente.<sup>9,10</sup> El puntaje de ERm al mes fue estimado para todos los pacientes. Un RFF al mes fue definido como un puntaje de ERm de 0 o 1.<sup>17</sup> Todos los eventos resultantes fueron evaluados por neurólogos de planta vasculares en los centros participantes individuales que no estaban al tanto de la información referente al pretratamiento con estatinas.

**Aprobaciones estándar del protocolo, registros y consentimiento de pacientes.** El protocolo del estudio fue aprobado por el comité de ética correspondiente de las instituciones participantes, y se obtuvo un consentimiento informado por escrito de todos los pacientes (o tutores de pacientes, cuando el consentimiento no podía ser obtenido directamente de los pacientes) participantes en el estudio.<sup>18</sup>

**Análisis estadístico.** Presentamos datos paramétricos continuos utilizando los valores medios junto con sus DE correspondientes. Utilizamos medianas con sus rangos intercuartiles correspondientes para la presentación de datos no paramétricos y porcentajes para todas las variables dicotómicas. Las comparaciones estadísticas entre los diferentes subgrupos fueron realizadas utilizando el test  $\chi^2$ , el test de  $t$  no pareado o el Mann-Whitney  $U$  test, según fuese apropiado.

Utilizamos el método de Kaplan-Meier producto-límite para calcular las probabilidades acumuladas tanto de la mortalidad como de la recurrencia de infarto cerebral a 30 días luego de evento inicial. Los factores que estuvieron asociados con el riesgo de recurrencia de infarto cerebral y mortalidad a 30 días fueron identificados utilizando análisis de riesgos proporcionales Cox. Las asociaciones están presentadas como *hazard ratios* (HR) con intervalos de confianza (IC) del 95% correspondientes.

Utilizamos el análisis de regresión logística univariable y multivariable para alcanzar posibles predictores de RFF. En los análisis multivariables, probamos la hipótesis del significado estadístico bajo la prueba de razón de probabilidad con un valor  $\alpha$  de 0,05. Reportamos todas las asociaciones como *odds ratios* (OR) con sus IC del 95% correspondientes.

Para el análisis de puntaje de propensión, construimos un modelo de regresión logística multivariable para considerar el uso de estatinas antes del inicio del infarto cerebral entre todos los pacientes con infarto cerebral con AGA. El objetivo de los análisis de puntaje de propensión fue minimizar potenciales desbalances en la distribución de confundidores potenciales entre los usuarios y no usuarios de estatinas como se describió previamente en detalle.<sup>19</sup> Utilizando el set de datos pareados final, se generaron nuevos riesgos Cox proporcionales completamente ajustados y modelos de regresión logística para determinar la asociación del uso de estatinas preinfarto cerebral con la mortalidad a 30 días, la recurrencia de infarto y el RFF. La información adicional sobre los análisis estadísticos (regresión Cox y modelos de regresión logística, como también enfoque del pareamiento por puntaje de propensión) está disponible en *e-Methods*.

Para todos los análisis estadísticos se utilizó el *software* estadístico Stat liberado 13 para Windows (Stata-Corp LP, College Station, TX).

**RESULTADOS Análisis no pareados.** Un total de 516 pacientes con infarto cerebral con AGA (edad media: 65.3 ± 13.4 años; 60,8% hombres; 42,2% asiáticos, 57,8% caucásicos; mediana del puntaje de NIHSS: 9, rango intercuartil: 5-18) fueron incluidos durante el período del estudio. Los datos de la medicación estuvieron disponibles para todos los pacientes, sin valores faltantes. Todos los pacientes reportaron haber estado tomando la medicación prescrita los días previos a la admisión. Ninguno de los pacientes recibió procedimientos de revascularización intra-arterial. El consumo de estatinas antes del inicio del infarto cerebral fue reportado en 192 (37,2%) pacientes. Los pacientes con pretratamiento con estatinas antes del inicio del infarto cerebral tuvieron tasas mayores de diabetes mellitus ( $p < 0,001$ ), hipertensión ( $p = 0,026$ ), hipercolesterolemia ( $p = 0,001$ ), enfermedad coronaria ( $p = 0,001$ ) y administración de antiplaquetarios ( $p = 0,001$ ) y antihipertensivos ( $p = 0,001$ ) antes de la admisión, y menores niveles de lipoproteína de baja densidad en la admisión ( $p = 0,001$ ), al ser comparados con los pacientes que no recibían estatinas antes del inicio del infarto cerebral (tabla 1). Los 2 grupos no difirieron en la edad ( $p = 0,771$ ), sexo ( $p = 0,408$ ), severidad basal del infarto cerebral ( $p = 0,279$ ), localización intracraneal de la aterosclerosis ( $p = 0,589$ ) y duración de la hospitalización ( $p = 0,674$ ). Las tasas de endarterectomía carotídea fueron similares entre los pacientes con y sin pretratamiento con estatinas (63,0% vs 57,7%;  $p = 0,235$ ).

Un total de 29 casos de infarto cerebral recurrente fueron identificados en nuestras poblaciones en estudio. Hubo 28 casos de infarto cerebral isquémico.

**Tabla 1** Características basales de subgrupos no pareados y con pareamiento por propensión

| Variable                                          | No pareado                       |                                  |           | Pareamiento por propensión       |                                  |           |
|---------------------------------------------------|----------------------------------|----------------------------------|-----------|----------------------------------|----------------------------------|-----------|
|                                                   | Con pretratamiento con estatinas | Sin pretratamiento con estatinas | Valor $p$ | Con pretratamiento con estatinas | Sin pretratamiento con estatinas | Valor $p$ |
| No. de pacientes                                  | 192                              | 324                              |           | 173                              | 173                              |           |
| Edad, años, media ± DE                            | 65.1 ± 11.4                      | 65.4 ± 14.5                      | 0,771     | 64.8 ± 11.3                      | 64.3 ± 15.5                      | 0,725     |
| Hombres, %                                        | 63,5                             | 59,8                             | 0,408     | 61,8                             | 58,3                             | 0,510     |
| Diabetes mellitus, %                              | 38,5                             | 22,2                             | < 0,001   | 39,3                             | 32,4                             | 0,178     |
| Hipertensión, %                                   | 77,6                             | 68,5                             | 0,026     | 76,9                             | 75,1                             | 0,705     |
| Tabaquismo, %                                     | 31,2                             | 32,1                             | 0,841     | 31,2                             | 31,2                             | 1,000     |
| Hipercolesterolemia, %                            | 100                              | 32,7                             | 0,001     | 100                              | 31,8                             | < 0,001   |
| Enfermedad coronaria, %                           | 30,7                             | 15,1                             | 0,001     | 27,7                             | 21,4                             | 0,169     |
| Fibrilación auricular, %                          | 23,4                             | 22,2                             | 0,750     | 22,5                             | 21,9                             | 0,897     |
| Enfermedad arterial periférica, %                 | 3,9                              | 7,3                              | 0,137     | 40,5                             | 46,2                             | 0,791     |
| Antiplaquetarios antes del infarto cerebral, %    | 51,6                             | 25,4                             | 0,001     | 49,1                             | 39,9                             | 0,084     |
| Anticoagulantes antes del infarto cerebral, %     | 36,4                             | 27,9                             | 0,586     | 34,6                             | 34,6                             | 1,000     |
| Antihipertensivos antes del infarto cerebral, %   | 73,9                             | 55,7                             | 0,001     | 75,1                             | 74,6                             | 0,901     |
| NIHSS <sub>adm</sub> , puntos, mediana (IQR)      | 10 (5-19)                        | 9 (5-18)                         | 0,279     | 9 (4-18)                         | 8 (5-18)                         | 0,802     |
| Glucosa en la admisión, mediana (IQR)             | 122 (106-154)                    | 119 (104-159)                    | 0,523     | 122 (104-154)                    | 121 (103-158)                    | 0,590     |
| Colesterol total en la admisión, media ± DE       | 197 ± 56                         | 201 ± 49                         | 0,394     | 196 ± 54                         | 202 ± 47                         | 0,237     |
| Colesterol LDL en la admisión, mediana (IQR)      | 72 (41-120)                      | 94 (54-136)                      | 0,001     | 63 (40-113)                      | 82 (51-127)                      | 0,014     |
| Colesterol HDL en la admisión, mediana (IQR)      | 63 (42-115)                      | 54 (40-109)                      | 0,188     | 66 (43-120)                      | 61 (43-134)                      | 0,750     |
| TG en la admisión, mediana (IQR)                  | 116 (82-183)                     | 112 (82-151)                     | 0,095     | 117 (82-186)                     | 116 (87-163)                     | 0,403     |
| TEV, %                                            | 43,2                             | 47,2                             | 0,378     | 38,7                             | 31,8                             | 0,177     |
| Localización intracraneal de la aterosclerosis, % | 30,7                             | 33,0                             | 0,589     | 34,1                             | 26,0                             | 0,101     |
| Aterosclerosis de la circulación posterior, %     | 12,5                             | 16,9                             | 0,172     | 12,1                             | 13,9                             | 0,632     |
| Días de hospitalización, mediana (IQR)            | 10 (7-16)                        | 10 (7-17)                        | 0,674     | 11 (7-17)                        | 10 (7-16)                        | 0,969     |

Abreviaturas: HDL = lipoproteína de alta densidad; IQR = rango intercuartil; LDL = lipoproteína de baja densidad; NIHSS<sub>adm</sub> = escala de infarto cerebral del NIH en la admisión hospitalaria; TEV = trombólisis endovenosa; TG = triglicéridos.

mico (97%) y un caso de hemorragia intracerebral (3%). El mecanismo etiopatogénico más común de los infartos isquémicos recurrentes fue la AGA (n = 20; 71%), la enfermedad de pequeño vaso (n = 2; 7%), el cardioembolismo (n = 2; 7%), el infarto de otra etiología determinada (n = 1; 4%) y el infarto de etiología indeterminada (n = 3; 11%). La recurrencia de infarto cerebral fue en el mismo territorio vascular en todos los pacientes con infarto cerebral recurrente debido a AGA (n = 20; 71%). Un total de 6 casos con infartos cerebrales recurrentes fueron fatales (21%). Los datos referentes a la severidad entre los sobrevivientes del infarto cerebral no fueron recolectados sistemáticamente durante el período de seguimiento de 30 días.

Los pacientes con AGA pretratados con estatinas tuvieron menor tasa de mortalidad a 30 días ( $p = 0,037$ ) y de infarto cerebral recurrente a 30 días ( $p = 0,002$ ), menor NIHSS<sub>alt</sub> ( $p = 0,010$ ), mayor descenso absoluto de NIHSS durante la hospitalización ( $p = 0,004$ ) y menor puntaje promedio en la ERM a los 30 días ( $p = 0,029$ ) en comparación con los pacientes que no estaban tratados con estatinas antes del inicio del infarto cerebral en el análisis inicial no ajustado (tabla 2). La mejoría neurológica durante la hospitalización fue mayor en pacientes con pretratamiento con estatinas que sin este (66,7% vs 38,9%;  $p = 0,004$ ). La tasa de RFF fue mayor en pacientes con pretratamiento con estatinas (51,6% vs 40,1%;  $p = 0,011$ ).

En el análisis de sobrevida, la mortalidad acumulada a 30 días fue mayor en pacientes que no estaban pretratados con estatinas antes del inicio del infarto cerebral (10,5% [7,2%-13,8%] vs 5,25 [2,1%-8,3%]; log rank = 4,24;  $df = 1$ ;  $p = 0,039$ ) (figura, A). Los pacientes que no estaban pretratados con estatinas también tuvieron una recurrencia acumulada de infarto cerebral a 30 días mayor (8% [5,1%-10,9%] vs 1,6% [0%-3,4%]; log rank = 9,69;  $df = 1$ ;  $p = 0,002$ ) (figura, B).

La tabla 3 y la tabla e-1 resumen los predictores de mortalidad a 30 días y recurrencia de infarto cerebral a 30 días en los análisis de regresión Cox univariable y multivariable. En el análisis univariable, el riesgo de mortalidad a 30 días (tabla e-1) estuvo asociado con el tabaquismo ( $p = 0,023$ ), la enfermedad coronaria ( $p = 0,003$ ), la fibrilación auricular ( $p = 0,027$ ), el pretratamiento con estatinas ( $p = 0,044$ ), el pretratamiento con antiplaquetarios ( $p = 0,033$ ), NIHSS<sub>adm</sub> ( $p < 0,001$ ), la glucemia en la admisión ( $p = 0,015$ ), el colesterol total en la admisión ( $p = 0,002$ ), el colesterol HDL en la admisión ( $p = 0,002$ ), los triglicéridos en la admisión ( $p = 0,044$ ) y la trombólisis EV (TEV) ( $p < 0,001$ ). En el modelo multivariable, solo la historia de enfermedad coronaria (HR = 2,10; IC 95%: 1,10-4,36;  $p = 0,046$ ), el consumo de estatinas antes del inicio del infarto cerebral (HR = 0,30; IC 95%: 0,13-0,69;  $p = 0,005$ ) y el NIHSS<sub>adm</sub> (HR = 1,07; IC 95%: 1,02-1,12;  $p = 0,009$ ) estuvieron independientemente asociados con riesgo de mortalidad a 30 días (tabla e-1).

En los análisis de regresión Cox univariables iniciales los siguientes factores emergieron como potenciales predictores de riesgo de recurrencia de infarto cerebral a 30 días (tabla 3): hipercolesterolemia ( $p = 0,070$ ), enfermedad arterial periférica ( $p = 0,002$ ), pretratamiento con estatinas ( $p = 0,006$ ) y TEV ( $p = 0,037$ ). En el análisis multivariable, solo la enfermedad arterial periférica (HR = 2,97; IC 95%: 1,17-7,52;  $p = 0,021$ ) y el pretratamiento con estatinas (HR = 0,18; IC 95%: 0,05-0,66;  $p = 0,010$ ) estuvieron independientemente asociados con el riesgo de recurrencia de infarto cerebral a 30 días (tabla 3).

Los modelos logísticos univariable y multivariable fueron utilizados para identificar predictores independientes de RFF al mes (tabla 4). En el análisis univariable inicial, la edad ( $p < 0,001$ ), la diabetes mellitus ( $p = 0,004$ ), el tabaquismo ( $p$

**Tabla 2** Resultados principales de subgrupos no pareados y con pareamiento por propensión

| Variable                                                                                | No pareado                       |                                  |           | Pareamiento por propensión       |                                  |           |
|-----------------------------------------------------------------------------------------|----------------------------------|----------------------------------|-----------|----------------------------------|----------------------------------|-----------|
|                                                                                         | Con pretratamiento con estatinas | Sin pretratamiento con estatinas | Valor $p$ | Con pretratamiento con estatinas | Sin pretratamiento con estatinas | Valor $p$ |
| NIHSS <sub>alt</sub> , puntos, mediana (IQR)                                            | 2 (0-8)                          | 4 (1-10)                         | 0,010     | 2 (0-7)                          | 4,5 (2-10)                       | 0,004     |
| Decremento absoluto en el puntaje NIHSS durante hospitalización, puntos, mediana (IQR)  | 4 (1-9)                          | 3 (1-7)                          | 0,004     | 4 (1-9)                          | 3 (1-6)                          | 0,015     |
| Decremento absoluto en el puntaje NIHSS durante hospitalización, puntos, media $\pm$ DE | 5,67 $\pm$ 6,60                  | 3,79 $\pm$ 7,18                  | 0,005     | 5,4 $\pm$ 6,46                   | 3,5 $\pm$ 7,13                   | 0,014     |
| Mejoría neurológica durante hospitalización, puntos, % mediana (IQR)                    | 66,7 (28,5-100,0)                | 38,9 (13,6-80,0)                 | 0,004     | 66,7 (28,6-100,0)                | 34,8 (12,5-75,0)                 | < 0,001   |
| Muerte a 30 d, %                                                                        | 5,2                              | 10,5                             | 0,037     | 3,5                              | 8,7                              | 0,043     |
| Infarto recurrente a 30 d, %                                                            | 1,6                              | 8,0                              | 0,002     | 1,3                              | 8,7                              | 0,004     |
| Puntaje mRS a 30 d, mediana (IQR)                                                       | 1 (0-4)                          | 2 (1-4)                          | 0,029     | 1 (0-4)                          | 2 (1-4)                          | 0,013     |
| RFF a 30 d, %                                                                           | 51,6                             | 40,1                             | 0,011     | 52,0                             | 34,7                             | 0,001     |

Abreviaturas: IQR = rango intercuartil; mRS = Escala de Rankin modificada; NIHSS<sub>alt</sub> = escala de infarto cerebral del NIH al alta hospitalaria; RFF = resultado funcional favorable.

**Figura 1** Curvas de Kaplan-Meier de pacientes sin y con pretratamiento con estatinas antes del inicio del infarto cerebral

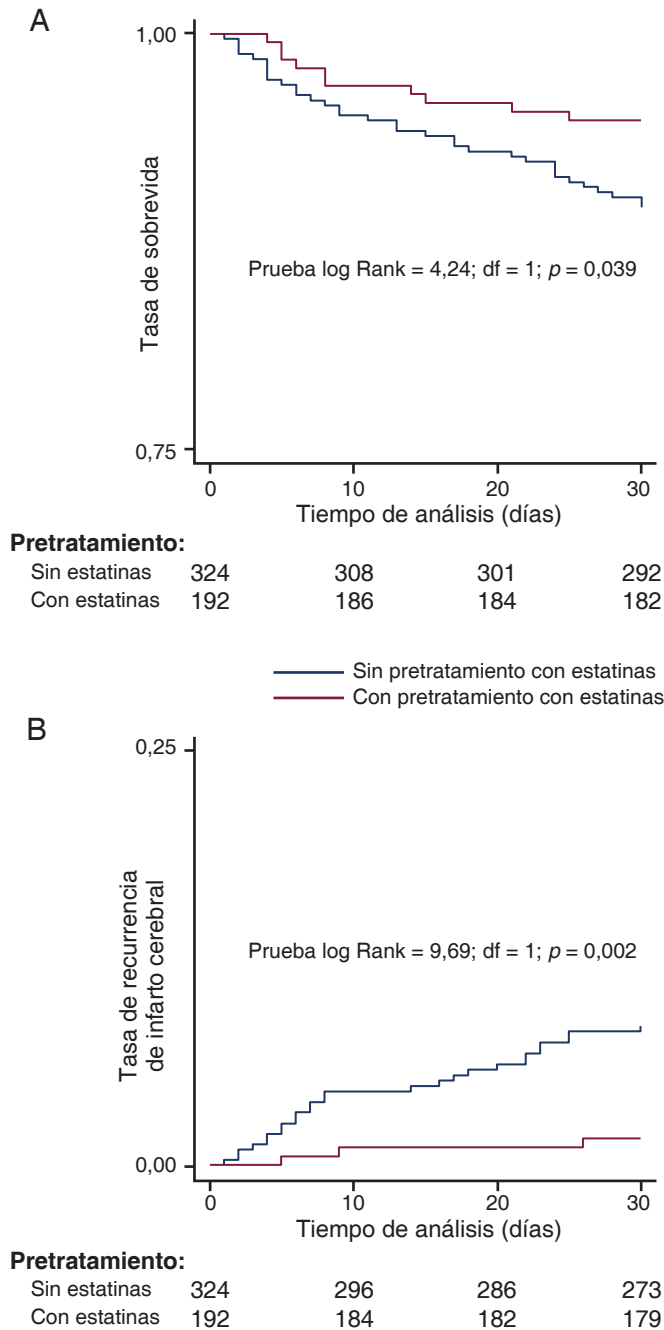

(A) Supervivencia a los 30 días y (B) riesgo de infarto cerebral recurrente a 30 días de pacientes sin y con pretratamiento con estatinas antes del inicio del infarto cerebral.

= 0,007), la enfermedad coronaria ( $p = 0,053$ ), la fibrilación auricular ( $p = 0,060$ ), el consumo de estatinas antes del inicio del infarto cerebral ( $p = 0,012$ ), el consumo de antiplaquetarios antes de inicio del infarto cerebral ( $p = 0,021$ ), los antihipertensivos antes del inicio del infarto cerebral ( $p = 0,041$ ), el puntaje de NIHSS en la admisión ( $p < 0,001$ ), la glucemia en la admisión ( $p = 0,036$ ), la TEV ( $p < 0,001$ ) y la aterosclerosis de localización intracraneal ( $p = 0,094$ ) estuvieron asociados con RFF. En el análisis multivariable,

solo la diabetes mellitus (OR = 0,41; IC 95%: 0,24-0,70;  $p = 0,001$ ), el pretratamiento con estatinas (OR = 3,32; IC 95%: 2,02-5,46;  $p < 0,001$ ), el NIHSS<sub>adm</sub> (OR = 0,82; IC 95%: 0,78-0,85;  $p < 0,001$ ) y la TEV (OR = 3,04; IC 95%: 1,70-5,41;  $p < 0,001$ ) estuvieron asociados con RFF a los 30 días (tabla 4).

**Análisis del pareamiento por propensión.** El pareamiento por puntaje de propensión resultó en 2 subgrupos de 173 pacientes que fueron balanceados para todas las variables confundidoras potenciales, excepto para historia de hipercolesterolemia ( $p < 0,001$ ) y valores totales de colesterol en la admisión ( $p = 0,014$ ; tabla 1), ambos relacionados con la variable de pareamiento del pretratamiento con estatinas.

Los pacientes con AGA pretratados con estatinas tuvieron menor mortalidad a 30 días ( $p = 0,043$ ) y menores tasas de infarto cerebral recurrente ( $p = 0,004$ ), menor NIHSS<sub>alt</sub> ( $p = 0,004$ ), mayor reducción absoluta del NIHSS en la hospitalización ( $p = 0,015$ ) y menor puntaje medio en la ERM a 30 días ( $p = 0,013$ ), con mayores tasas de RFF a 30 días ( $p = 0,001$ ) en el análisis de pareamiento por puntaje de propensión inicial no ajustado (tabla 2). La mejora neurológica durante la hospitalización fue mayor en los pacientes con pretratamiento con estatinas que en aquellos sin el pretratamiento (66,7% vs 34,8%;  $p < 0,001$ ). La tasa de RFF fue mayor en pacientes con pretratamiento con estatinas (52,0% vs 34,7%;  $p = 0,001$ ).

En el análisis de regresión Cox univariable, los siguientes factores emergieron como predictores de riesgo de mortalidad a 30 días: la edad ( $p = 0,083$ ), la enfermedad coronaria ( $p = 0,014$ ), la fibrilación auricular ( $p = 0,007$ ), el pretratamiento con estatinas ( $p = 0,052$ ), el pretratamiento con antiplaquetarios ( $p = 0,006$ ), el NIHSS<sub>adm</sub> ( $p < 0,001$ ), el colesterol total en la admisión ( $p = 0,076$ ), la TEV ( $p = 0,001$ ) y la localización intracraneal ( $p = 0,037$ ) o posterior ( $p = 0,057$ ) de la aterosclerosis. En el modelo multivariable, sólo el pretratamiento con estatinas (HR = 0,24; IC 95%: 0,08-0,75;  $p = 0,014$ ), el consumo de antiplaquetarios previo al inicio del infarto (HR = 8,21; IC 95%: 2,18-30,9;  $p = 0,002$ ), y el NIHSS<sub>adm</sub> (HR = 1,19; IC 95%: 1,09-1,30;  $p < 0,001$ ) estuvieron independientemente asociados con el riesgo de mortalidad a 30 días (tabla e-1).

En el análisis de regresión Cox univariable, los siguientes factores emergieron como predictores de riesgo de recurrencia de infarto cerebral a 30 días (tabla 3): la diabetes mellitus ( $p = 0,009$ ), la hipercolesterolemia ( $p = 0,058$ ), la fibrilación auricular ( $p = 0,084$ ), el pretratamiento con estatinas ( $p = 0,009$ ) y la TEV ( $p = 0,055$ ). En el análisis multivariable, la diabetes mellitus (HR = 5,85; IC 95%: 2,12-16,1;  $p = 0,001$ ), la fibrilación auricular (HR = 3,53; IC 95%: 1,32-9,40;  $p = 0,012$ ), el pretratamiento con estatinas (HR = 0,11; IC 95%: 0,02-0,46;  $p = 0,003$ ) y la TEV (HR = 0,14; IC 95%: 0,03-0,66;  $p = 0,013$ ) estuvieron independientemente asociados con el riesgo de recurrencia de infarto cerebral a 30 días (tabla 3).

**Tabla 3** Análisis univariable y multivariable para el riesgo de infarto cerebral recurrente a 30 días

| Variable                                                | No pareado           |                |                        |                | Pareamiento por propensión |                |                        |                |
|---------------------------------------------------------|----------------------|----------------|------------------------|----------------|----------------------------|----------------|------------------------|----------------|
|                                                         | Análisis univariable |                | Análisis multivariable |                | Análisis univariable       |                | Análisis multivariable |                |
|                                                         | HR (IC 95%)          | Valor <i>p</i> | HR (IC 95%)            | Valor <i>p</i> | HR (IC 95%)                | Valor <i>p</i> | HR (IC 95%)            | Valor <i>p</i> |
| Edad                                                    | 1,01 (0,98-1,04)     | 0,367          | -                      | -              | 1,02 (0,99-1,06)           | 0,208          | -                      | -              |
| Hombres                                                 | 1,25 (0,58-2,65)     | 0,569          | -                      | -              | 1,33 (0,51-3,47)           | 0,563          | -                      | -              |
| Diabetes mellitus                                       | 1,81 (0,86-3,8)      | 0,114          | -                      | -              | 3,69 (1,38-9,83)           | 0,009          | 5,85 (2,12-16,1)       | 0,001          |
| Hipertensión                                            | 0,73 (0,35-1,59)     | 0,440          | -                      | -              | 0,49 (0,19-1,26)           | 0,137          | -                      | -              |
| Tabaquismo                                              | 1,25 (0,59-2,66)     | 0,550          | -                      | -              | 1,07 (0,40-2,84)           | 0,896          | -                      | -              |
| Hipercolesterolemia                                     | 0,50 (0,24-1,05)     | 0,070          | 1,20 (0,53-2,75)       | 0,661          | 0,41 (0,16-1,03)           | 0,058          | 1,70 (0,56-6,16)       | 0,347          |
| Enfermedad coronaria                                    | 1,56 (0,69-3,54)     | 0,278          | -                      | -              | 1,63 (0,61-4,35)           | 0,325          | -                      | -              |
| Fibrilación auricular                                   | 1,34 (0,59-3,02)     | 0,481          | -                      | -              | 2,30 (0,89-5,94)           | 0,084          | 3,53 (1,32-9,40)       | 0,012          |
| Enfermedad arterial periférica                          | 4,22 (1,71-10,4)     | 0,002          | 2,97 (1,17-7,52)       | 0,021          | 2,75 (0,63-11,96)          | 0,117          | -                      | -              |
| Estatinas antes del inicio del infarto cerebral         | 0,18 (0,05-0,61)     | 0,006          | 0,18 (0,05-0,66)       | 0,010          | 0,19 (0,06-0,66)           | 0,009          | 0,11 (0,02-0,46)       | 0,003          |
| Antiplaquetarios antes del inicio del infarto cerebral  | 0,84 (0,38-1,36)     | 0,682          | -                      | -              | 1,03 (0,41-2,61)           | 0,952          | -                      | -              |
| Anticoagulantes antes del inicio del infarto cerebral   | -                    | -              | -                      | -              | -                          | -              | -                      | -              |
| Antihipertensivos antes del inicio del infarto cerebral | 1,16 (0,54-2,49)     | 0,705          | -                      | -              | 1,17 (0,38-3,55)           | 0,785          | -                      | -              |
| NIHSS <sub>adm</sub>                                    | 0,97 (0,93-1,02)     | 0,264          | -                      | -              | 0,99 (0,93-1,05)           | 0,669          | -                      | -              |
| Glucosa en la admisión                                  | 1,00 (0,99-1,00)     | 0,237          | -                      | -              | 1,00 (0,99-1,01)           | 0,114          | -                      | -              |
| Colesterol total en la admisión                         | 0,99 (0,98-1,00)     | 0,582          | -                      | -              | 0,99 (0,98-1,01)           | 0,481          | -                      | -              |
| LDL en la admisión                                      | 1,00 (0,99-1,01)     | 0,766          | -                      | -              | 0,99 (0,98-1,01)           | 0,246          | -                      | -              |
| HDL en la admisión                                      | 1,00 (0,99-1,01)     | 0,911          | -                      | -              | 1,00 (0,99-1,01)           | 0,540          | -                      | -              |
| TG en la admisión                                       | 0,99 (0,98-1,00)     | 0,163          | -                      | -              | 1,00 (0,99-1,01)           | 0,456          | -                      | -              |
| TEV                                                     | 0,40 (0,17-0,95)     | 0,037          | 0,43 (0,17-1,10)       | 0,074          | 0,24 (0,05-1,03)           | 0,055          | 0,14 (0,03-0,66)       | 0,013          |
| Localización intracraneal de la aterosclerosis          | 1,12 (0,56-2,23)     | 0,749          | -                      | -              | 1,18 (0,48-2,87)           | 0,716          | -                      | -              |
| Aterosclerosis de la circulación posterior              | 1,57 (0,76-3,2)      | 0,219          | -                      | -              | 1,29 (0,44-3,76)           | 0,635          | -                      | -              |

Abreviaturas: IC = intervalo de confianza; HDL = lipoproteína de alta densidad; LDL = lipoproteína de baja densidad; NIHSS<sub>adm</sub> = escala de infarto cerebral del NIH al alta hospitalaria; HR = *hazard ratios*; TEV = trombólisis endovenosa; TG = triglicéridos.

En la regresión logística univariable, la probabilidad de un RFF a 30 días estuvo asociada con la edad ( $p < 0,001$ ), el sexo masculino ( $p = 0,032$ ), la diabetes mellitus ( $p = 0,008$ ), el tabaquismo ( $p = 0,005$ ), la hipercolesterolemia ( $p = 0,021$ ), la enfermedad coronaria ( $p = 0,049$ ), el consumo de estatinas previo al inicio del infarto ( $p = 0,001$ ), el consumo de antiplaquetarios previo al inicio del infarto ( $p = 0,034$ ), el NIHSS<sub>adm</sub> ( $p < 0,001$ ), la administración de TEV ( $p = 0,001$ ) y la localización intracraneal de la aterosclerosis ( $p = 0,028$ ). En el análisis multivariable, la edad (OR = 0,97; IC 95%: 0,95-0,99;  $p = 0,021$ ), el sexo masculino (OR = 1,86; IC 95%: 1,02-3,42;  $p = 0,044$ ), la diabetes mellitus (OR = 0,29; IC 95%: 0,16-0,53;  $p < 0,001$ ), el pretratamiento con estatinas (OR = 2,44; IC 95%: 1,07-5,53;  $p = 0,033$ ), el pretratamiento con antiplaquetarios (OR = 0,44; IC 95%: 0,24-0,81;  $p = 0,008$ ), el NIHSS<sub>adm</sub> (OR = 0,79; IC 95%: 0,75-0,84;  $p < 0,001$ ) y la administración de TEV (OR = 4,37; IC 95%: 1,85-10,34;  $p = 0,001$ ) estuvieron independientemente asociados con un RFF a 30 días (tabla 4).

**DISCUSIÓN** Nuestro estudio mostró que tanto en los análisis con puntaje de propensión no pareado y pareado, el pretratamiento con estatinas estuvo asociado con mejores resultados tempranos en términos de mejoría neurológica durante la hospitalización, la sobrevida del infarto cerebral a 30 días, la recurrencia de infarto cerebral a 30 días y un RFF a 30 días, en pacientes con ACVi debido a AGA. Estos hallazgos llevan a apoyar las recomendaciones actuales de la AHA para el manejo de ACVi que abogan por la continuación del tratamiento con estatinas durante la hospitalización entre pacientes con ACVi pretratados con estatinas.<sup>20</sup> Este enunciado está basado solamente en hallazgos observacionales,<sup>1-3,21,22</sup> mientras que están en fase III los datos de un ensayo controlado y aleatorizado (ECA) sobre la seguridad y eficacia de las estatinas durante los primeros 30 días el ictus.<sup>23-26</sup> Por lo tanto, nuestras observaciones aportan un conocimiento adicional en relación con los efectos beneficiosos del pretratamiento con estatinas en pacientes con AGA, que conlleva a un menor riesgo de deterioro neurológico temprano y recurrencia temprana de

Tabla 4 Análisis univariable y multivariable de la probabilidad de un resultado funcional favorable a 30 días

| Variable                                                | No pareado           |         |                        |         | Pareamiento por propensión |         |                        |         |
|---------------------------------------------------------|----------------------|---------|------------------------|---------|----------------------------|---------|------------------------|---------|
|                                                         | Análisis univariable |         | Análisis multivariable |         | Análisis univariable       |         | Análisis multivariable |         |
|                                                         | OR (IC 95%)          | Valor p | OR (IC 95%)            | Valor p | OR (IC 95%)                | Valor p | OR (IC 95%)            | Valor p |
| Edad                                                    | 0,98 (0,96-0,99)     | < 0,001 | 0,98 (0,96-1,00)       | 0,099   | 0,97 (0,95-0,98)           | < 0,001 | 0,97 (0,95-0,99)       | 0,021   |
| Hombres                                                 | 1,33 (0,93-1,90)     | 0,114   | –                      | –       | 1,61 (1,04-2,49)           | 0,032   | 1,86 (1,02-3,42)       | 0,044   |
| Diabetes mellitus                                       | 0,55 (0,37-0,83)     | 0,004   | 0,41 (0,24-0,70)       | 0,001   | 0,54 (0,34 (0,85)          | 0,008   | 0,29 (0,16-0,53)       | < 0,001 |
| Hipertensión                                            | 0,74 (0,51-1,09)     | 0,132   | –                      | –       | 0,77 (0,47-1,27)           | 0,308   | –                      | –       |
| Tabaquismo                                              | 1,67 (1,15-2,43)     | 0,007   | 0,83 (0,51-1,35)       | 0,452   | 1,94 (1,23-3,08)           | 0,005   | 0,82 (0,43-1,56)       | 0,547   |
| Hipercolesterolemia                                     | 1,28 (0,90-1,83)     | 0,165   | –                      | –       | 1,72 (1,09-2,72)           | 0,021   | 1,57 (0,65-3,76)       | 0,313   |
| Enfermedad coronaria                                    | 0,65 (0,42-1,01)     | 0,053   | 0,61 (0,35-1,08)       | 0,091   | 0,60 (0,36-0,99)           | 0,049   | 0,56 (0,29-1,10)       | 0,092   |
| Fibrilación auricular                                   | 0,66 (0,43-1,02)     | 0,060   | 1,32 (0,76-2,27)       | –       | 0,64 (0,38-1,08)           | 0,097   | 1,35 (0,67-2,74)       | 0,401   |
| Enfermedad arterial periférica                          | 0,94 (0,44-2,00)     | 0,868   | –                      | –       | 1,15 (0,41-3,25)           | 0,791   | –                      | –       |
| Estatinas antes del inicio del infarto cerebral         | 1,59 (1,11-2,28)     | 0,012   | 3,32 (2,02-5,46)       | < 0,001 | 2,04 (1,32-3,15)           | 0,001   | 2,44 (1,07-5,53)       | 0,003   |
| Antiplaquetarios antes del inicio del infarto cerebral  | 0,65 (0,45-0,93)     | 0,021   | 0,62 (0,37-1,02)       | 0,060   | 0,62 (0,41-0,96)           | 0,034   | 0,44 (0,24-0,81)       | 0,008   |
| Anticoagulantes antes del inicio del infarto cerebral   | 0,97 (0,36-2,65)     | 0,953   | –                      | –       | 0,93 (0,29-2,99)           | 0,905   | –                      | –       |
| Antihipertensivos antes del inicio del infarto cerebral | 0,69 (0,48-0,98)     | 0,041   | 0,80 (0,47-1,35)       | 0,415   | 0,81 (0,55-1,33)           | 0,412   | –                      | –       |
| NIHSS <sub>adm</sub>                                    | 0,87 (0,85-0,90)     | < 0,001 | 0,82 (0,78-0,85)       | < 0,001 | 0,86 (0,83-0,89)           | < 0,001 | 0,79 (0,75-0,84)       | < 0,001 |
| Glucosa en la admisión                                  | 0,996 (0,994-0,999)  | 0,036   | 1,00 (0,99-1,01)       | 0,325   | 0,997 (0,993-1,001)        | 0,134   | –                      | –       |
| Colesterol total en la admisión                         | 1,00 (0,9-1,01)      | 0,148   | –                      | –       | 1,00 (0,99-1,01)           | 0,442   | –                      | –       |
| LDL en la admisión                                      | 1,00 (0,99-1,01)     | 0,537   | –                      | –       | 1,00 (0,99-1,01)           | 0,978   | –                      | –       |
| HDL en la admisión                                      | 1,00 (0,99-1,01)     | 0,327   | –                      | –       | 1,00 (0,99-1,01)           | 0,477   | –                      | –       |
| TG en la admisión                                       | 1,00 (0,99-1,01)     | 0,122   | –                      | –       | 1,00 (0,99-1,01)           | 0,173   | –                      | –       |
| TEV                                                     | 0,48 (0,34-0,69)     | < 0,001 | 3,04 (1,70-5,41)       | < 0,001 | 0,45 (0,28-0,72)           | 0,001   | 4,37 (1,85-10,34)      | 0,001   |
| Localización intracraneal de la aterosclerosis          | 0,74 (0,53-1,05)     | 0,094   | 0,80 (0,51-1,25)       | 0,326   | 0,60 (0,38-0,95)           | 0,028   | 0,79 (0,42-1,50)       | 0,481   |
| Aterosclerosis de la circulación posterior              | 1,32 (0,86-2,03)     | 0,197   | –                      | –       | 1,13 (0,64-1,98)           | 0,668   | –                      | –       |

Abreviaturas: IC = intervalo de confianza; HDL = lipoproteína de alta densidad; LDL = lipoproteína de baja densidad; NIHSS<sub>alt</sub> = escala de infarto cerebral del NIH al alta hospitalaria; OR = *odds ratio*; TEV = trombólisis endovenosa; TG = triglicéridos.

infarto cerebral. Más aún, el retiro de estatinas durante los primeros 3 días de la hospitalización de pacientes con ACVi también estuvo asociado con un riesgo aumentado de muerte o dependencia a 3 meses, de acuerdo con los hallazgos del ECA.<sup>27</sup> Debe notarse que la AGA representó por lejos el subgrupo más común (56%, 50/89) de pacientes con ACVi que fueron aleatorizados en este ensayo.

El pretratamiento con estatinas también mejoró el resultado posoperatorio tanto en pacientes sintomáticos<sup>28</sup> como asintomáticos<sup>29</sup> que realizaron endarterectomía carotídea. El efecto favorable del pretratamiento con estatinas también fue evidente en los resultados periprocedurales y posprocedurales en pacientes que tuvieron procedimientos de *stenting* de la arteria carótida.<sup>30-31</sup> Los resultados positivos antes mencionados podrían ser parcialmente explicados por el efecto de las estatinas tanto en la angiogénesis intra-placa<sup>32</sup> como en el contenido de macrófagos en las lesiones ateroscleróticas de la arteria carótida.<sup>33</sup>

El consumo previo de estatinas puede beneficiar preferentemente a pacientes con infartos cerebrales

aterotrombóticos por favorecimiento del desarrollo de circulación pial colateral.<sup>34</sup> Además, las estatinas también puede llevar a la estabilización de la placa y la potencial regresión de la aterosclerosis, ya que no sólo afectan la composición lipídica de la placa, sino que también reducen la inflamación, debido a sus efectos pleiotrópicos.<sup>35</sup> Más aún, las estatinas realzan la regulación positiva de la óxido nítrico sintasa del endotelio, mejorando la función endotelial y esta acción puede constituir un mediador para su efecto favorable en la hemodinámica cerebral y la autorregulación cerebral.<sup>36,37</sup> Finalmente, las estatinas pueden prevenir la progresión o recurrencia del infarto cerebral durante los primeros días del ictus debido a sus efectos antitrombóticos<sup>38</sup> y aumentando la fibrinólisis endógena.<sup>37,39</sup>

También deben ser reconocidas ciertas limitaciones de este reporte. Primero, el diseño observacional no nos permite inferir ninguna asociación causal entre el pretratamiento con estatinas y las mejoras en los resultados en pacientes con AGA aguda. Más aún, el período de seguimiento (1 mes) fue relativamente corto para la observación de resultados

primarios de infarto cerebral recurrente/muerte. En segundo lugar, no recolectamos información sobre la duración, la dosis y el tipo de terapia con estatinas preinfarto, ya que nuestro objetivo fue evaluar la eficacia global del pretratamiento del infarto cerebral sobre los resultados tempranos en pacientes con AGA. Tercero, no hubo adjudicación central de los eventos resultantes durante el período de seguimiento de 1 mes. Los datos sobre la severidad del infarto cerebral recurrente no estuvieron disponibles para los pacientes con recurrencia de infarto cerebral en el período de seguimiento de 30 días. No se recolectaron de forma prospectiva los datos sobre leucoaraiosis en los pacientes de nuestra cohorte y, por lo tanto, no podemos evaluar si el efecto beneficioso del pretratamiento con estatinas está acentuado en pacientes con infarto cerebral con mucha carga de enfermedad de pequeño vaso. En cuarto lugar, otros factores potenciales que podrían estar relacionados a la recurrencia del infarto cerebral (ej., socioeconómicos, inflamatorios) no fueron recolectados sistemáticamente en nuestra base de datos. En quinto lugar, no recolectamos datos para los siguientes confundidores potenciales: puntaje de ERM preinfarto (aunque incluimos solo pacientes con infarto cerebral isquémico de primera vez, y los puntajes basales de NIHSS estuvieron disponibles en todos los casos), último momento visto asintomático, el tiempo exacto de ventana de la intervención con endarterectomía carotídea (aunque la mayoría de los pacientes fueron operados durante las primeras 2 semanas desde el evento índice) y la iniciación de estatinas al alta (debido a la corta duración del período de seguimiento seleccionado). En sexto lugar, incluimos en nuestra cohorte de pacientes con AGA ciertos casos con fibrilación auricular coexistente si el médico tratante consideraba que el diagnóstico clínico de AGA era apoyado por información adicional incluyendo historia de AIT(s) en el mismo territorio vascular o la presencia de infartos subclínicos en el mismo territorio vascular.<sup>8</sup> Sin embargo, debería notarse que esto puede haber resultado en una mala clasificación de ciertos pacientes con infarto de etiología no determinada al subgrupo de AGA.<sup>8</sup> Sin embargo, optamos por incluir estos pacientes en la cohorte de AGA para evitar un potencial sesgo de selección y para evaluar la asociación del pretratamiento con estatinas con resultados en una cohorte mayor de pacientes no selectivos con AGA, representando la experiencia clínica diaria. Más aún, todos nuestros análisis multivariados, tanto en las cohortes pareadas como no pareadas, han ajustado a la fibrilación auricular como potencial confundidor. Finalmente, las asociaciones reportadas pueden haber sido confundidas por no incluir las características específicas de la placa (como la ecogenicidad, la estabilidad o la ulceración de la placa) en nuestro análisis.<sup>11</sup>

Sin embargo, las principales fortalezas de nuestro reporte también deben ser consideradas. La primera y la más significativa es que nuestra población de estudio es una cohorte prospectiva de pacientes consecutivos con AGA aguda, reflejando una experiencia clínica diversa de las instituciones participantes.<sup>11</sup>

Aunque el diseño del estudio no incluyó una aleatorización, el pareamiento por puntaje de propensión resultó en subgrupos balanceados en un amplio número de características basales. Más aún, las asociaciones reportadas entre el pretratamiento con estatinas y los eventos resultantes fueron ajustadas para varios confundidores potenciales tanto en los análisis de puntaje de propensión no pareado y pareado.

Nuestros hallazgos aportan evidencia preliminar observacional subrayando un efecto beneficioso potencial de las estatinas en la mejora de los resultados tempranos en el infarto cerebral en pacientes con ACVi con un mecanismo aterotrombótico subyacente. Esta hipótesis merece ser testada en un ECA.

## CONTRIBUCIONES DE LOS AUTORES

Dr. Tsiygoulis: borrador del manuscrito, adquisición de datos, análisis e interpretación, concepto y diseño del estudio. Dr. Katsanos: borrador del manuscrito, análisis e interpretación. Dr. Sharma: adquisición de datos, revisión crítica del manuscrito para contenido intelectual importante. Dr. Krogias: adquisición de datos, revisión crítica del manuscrito para contenido intelectual importante. Dr. Mikulik: adquisición de datos, revisión crítica del manuscrito para contenido intelectual importante. Dr. Vadikolias: adquisición de datos, revisión crítica del manuscrito para contenido intelectual importante. Dr. Mijajlovic: adquisición de datos, revisión crítica del manuscrito para contenido intelectual importante. Dr. Safouris: adquisición de datos, revisión crítica del manuscrito para contenido intelectual importante. Dr. Zompola: adquisición de datos, revisión crítica del manuscrito para contenido intelectual importante. Dr. Faissner: adquisición de datos, revisión crítica del manuscrito para contenido intelectual importante. Dr. Weiss: adquisición de datos, revisión crítica del manuscrito para contenido intelectual importante. Dr. Giannopoulos: revisión crítica del manuscrito para contenido intelectual importante. Dr. Vasdekis: revisión crítica del manuscrito para contenido intelectual importante. Dr. Boviatis: revisión crítica del manuscrito para contenido intelectual importante. Dr. A.W. Alexandrov: revisión crítica del manuscrito para contenido intelectual importante. Dr. Voumvourakis: revisión crítica del manuscrito para contenido intelectual importante. Dr. A.V. Alexandrov: revisión crítica del manuscrito para contenido intelectual importante, supervisión del estudio.

## FONDOS PARA EL ESTUDIO

Dr. Georgios Tsiygoulis, Dr. Robert Mikulik y Dr. Viktor Weiss han sido apoyados por el European Regional Development Fund—Project St. Anne's University Hospital, Brno—International Clinical Research Center (FNUSA-ICRC) (CZ.1.05/1.1.00/02.0123).

## DECLARACIÓN DE INTERESES

Los autores no tienen nada para declarar relevante al manuscrito. Ir a [Neurology.org](http://Neurology.org) para declaraciones completas.

*Recibido el 10 de julio de 2015. Aceptado en su formato final el 16 de octubre de 2015.*

## BIBLIOGRAFÍA

1. Flint AC, Kamel H, Navi BB, et al. Inpatient statin use predicts improved ischemic stroke discharge disposition. *Neurology* 2012;78:1678–1683.
2. Flint AC, Kamel H, Navi BB, et al. Statin use during ischemic stroke hospitalization is strongly associated with improved poststroke survival. *Stroke* 2012;43:147–154.
3. Ni Chroinin D, Asplund K, Asberg S, et al. Statin therapy and outcome after ischemic stroke: systematic review and meta-analysis of observational studies and randomized trials. *Stroke* 2013;44:448–456.
4. Lakhan SE, Bagchi S, Hofer M. Statins and clinical outcome of acute ischemic stroke: a systematic review. *Int Arch Med* 2010;3:22.
5. Lovett JK, Coull AJ, Rothwell PM. Early risk of recurrence by subtype of ischemic stroke in population-based incidence studies. *Neurology* 2004;62:569–573.



6. Shin DH, Lee PH, Bang OY. Mechanisms of recurrence in subtypes of ischemic stroke: a hospital-based follow-up study. *Arch Neurol* 2005;62:1232–1237.
7. Merwick Á, Albers GW, Arsava EM, et al. Reduction in early stroke risk in carotid stenosis with transient ischemic attack associated with statin treatment. *Stroke* 2013;44:2814–2820.
8. Adams HP Jr, Bendixen BH, Kappelle LJ, et al. Classification of subtype of acute ischemic stroke: definitions for use in a multicenter clinical trial. TOAST. Trial of Org 10172 in Acute Stroke Treatment. *Stroke* 1993;24:35–41.
9. Tsivgoulis G, Stamboulis E, Sharma VK, et al. Multi-center external validation of the ABCD2 score in triaging TIA patients. *Neurology* 2010;74:1351–1357.
10. Tsivgoulis G, Bogiatzi C, Heliopoulos I, et al. Low ankle-brachial index predicts early risk of recurrent stroke in patients with acute cerebral ischemia. *Atherosclerosis* 2012;220:407–412.
11. Tsivgoulis G, Krogias C, Georgiadis GS, et al. Safety of early endarterectomy in patients with symptomatic carotid artery stenosis: an international multicenter study. *Eur J Neurol* 2014;21:1251–1257.
12. Adams HP Jr, del Zoppo G, Alberts MJ, et al. Guidelines for the early management of adults with ischemic stroke: a guideline from the American Heart Association/American Stroke Association Stroke Council, Clinical Cardiology Council, Cardiovascular Radiology and Intervention Council, and the Atherosclerotic Peripheral Vascular Disease and Quality of Care Outcomes in Research Interdisciplinary Working Groups: the American Academy of Neurology affirms the value of this guideline as an educational tool for neurologists. *Stroke* 2007;38:1655–1711.
13. Furie KL, Kasner SE, Adams RJ, et al. Guidelines for the prevention of stroke in patients with stroke or transient ischemic attack: a guideline for healthcare professionals from the American Heart Association/American Stroke Association. *Stroke* 2011;42:227–276.
14. Brott TG, Halperin JL, Abbara S, et al. 2011 ASA/ACCF/AHA/AANN/AANS/ACR/ASNR/CNS/SAIP/SCAI/SIR/SNIS/SVM/SVS guideline on the management of patients with extracranial carotid and vertebral artery disease: executive summary. *Stroke* 2011;42:e420–e463.
15. Alexandrov AV, Nguyen HT, Rubiera M, et al. Prevalence and risk factors associated with reversed Robin Hood syndrome in acute ischemic stroke. *Stroke* 2009;40:2738–2742.
16. Nam HS, Lee KY, Han SW, et al. Prediction of long-term outcome by percent improvement after the first day of thrombolytic treatment in stroke patients. *J Neurol Sci* 2009;281:69–73.
17. Tsivgoulis G, Zand R, Katsanos AH, et al. Safety of intravenous thrombolysis in stroke mimics: prospective 5-year study and comprehensive metaanalysis. *Stroke* 2015;46:1281–1287.
18. Tsivgoulis G, Sharma VK, Mikulik R, et al. Intravenous thrombolysis for acute ischemic stroke occurring during hospitalization for transient ischemic attack. *Int J Stroke* 2014;9:413–418.
19. Rosenbaum PR, Rubin DB. The central role of the propensity score in observational studies of causal effects. *Biometrika* 1983;70:41–45.
20. Jauch EC, Saver JL, Adams HP Jr, et al. Guidelines for the early management of patients with acute ischemic stroke: a guideline for healthcare professionals from the American Heart Association/American Stroke Association. *Stroke* 2013;44:870–947.
21. Martinez-Sanchez P, Fuentes B, Martinez-Martinez M, et al. Treatment with statins and ischemic stroke severity: does the dose matter? *Neurology* 2013;80:1800–1805.
22. Moonis M, Kane K, Schwiderski U, Sandage BW, Fisher M. HMG-CoA reductase inhibitors improve acute ischemic stroke outcome. *Stroke* 2005;36:1298–1300.
23. Amarenco P, Bogousslavsky J, Callahan A III, et al. High-dose atorvastatin after stroke or transient ischemic attack. *N Engl J Med* 2006;355:549–559.
24. Kennedy J, Hill MD, Ryckborst KJ, et al. Fast assessment of stroke and transient ischaemic attack to prevent early recurrence (FASTER): a randomised controlled pilot trial. *Lancet Neurol* 2007;6:961–969.
25. Beer C, Blacker D, Bynevelt M, Hankey GJ, Puddey IB. A randomized placebo controlled trial of early treatment of acute ischemic stroke with atorvastatin and irbesartan. *Int J Stroke* 2012;7:104–111.
26. Montaner J, Chacón P, Krupinski J, et al. Simvastatin in the acute phase of ischemic stroke: a safety and efficacy pilot trial. *Eur J Neurol* 2008;15:82–90.
27. Blanco M, Nombela F, Castellanos M, et al. Statin treatment withdrawal in ischemic stroke: a controlled randomized study. *Neurology* 2007;69:904–910.
28. Kennedy J, Quan H, Buchan AM, Ghali WA, Feasby TE. Statins are associated with better outcomes after carotid endarterectomy in symptomatic patients. *Stroke* 2005;36:2072–2076.
29. Heyer EJ, Mergeche JL, Bruce SS, et al. Statins reduce neurologic injury in asymptomatic carotid endarterectomy patients. *Stroke* 2013;44:1150–1152.
30. Takayama K, Taki W, Toma N, et al. Effect of pitavastatin on preventing ischemic complications with carotid artery stenting: a multicenter prospective study—EPOCH-CAS Study. *Cardiovasc Intervent Radiol* 2014;37:1436–1443.
31. Reiff T, Amiri H, Rohde S, Hacke W, Ringleb PA. Statins reduce periprocedural complications in carotid stenting. *Eur J Vasc Endovasc Surg* 2014;48:626–632.
32. Koutouzis M, Nomikos A, Nikolidakis S, et al. Statin treated patients have reduced intraplaque angiogenesis in carotid endarterectomy specimens. *Atherosclerosis* 2007;192:457–463.
33. Puato M, Faggini E, Rattazzi M, et al. Atorvastatin reduces macrophage accumulation in atherosclerotic plaques: a comparison of a nonstatin-based regimen in patients undergoing carotid endarterectomy. *Stroke* 2010;41:1163–1168.
34. Sargento-Freitas J, Pagola J, Rubiera M, et al. Preferential effect of pre-morbid statins on atherothrombotic strokes through collateral circulation enhancement. *Eur Neurol* 2012;68:171–176.
35. Shanmugam N, Roman-Rego A, Ong P, Kaski JC. Atherosclerotic plaque regression: fact or fiction? *Cardiovasc Drugs Ther* 2010;24:311–317.
36. Giannopoulos S, Katsanos AH, Tsivgoulis G, Marshall RS. Statins and cerebral hemodynamics. *J Cereb Blood Flow Metab* 2012;32:1973–1976.
37. Fisher M, Moonis M. Neuroprotective effects of statins: evidence from preclinical and clinical studies. *Curr Treat Options Cardiovasc Med* 2012;14:252–259.
38. Schafer A, Fracarrolo D, Eigenthaler M, et al. Rosuvastatin reduces platelet activation in heart failure: role of no bioavailability. *Arterioscler Thromb Vasc Biol* 2005;25:1071–1077.
39. Bourcier T, Libby P. HMG CoA reductase inhibitors reduce plasminogen activator inhibitor-1 expression by human vascular smooth muscle and endothelial cells. *Arterioscler Thromb Vasc Biol* 2000;20:556–562.
